# Supplementary material for: Urinary α1-Antichymotrypsin: A Biomarker of Prion Infection
Source: PLoS One. 2008 Dec 5;3(12):e3870. doi: 10.1371/journal.pone.0003870 (PMC2586086; doi:10.1371/journal.pone.0003870)
Supplement: Table S1 — (0.08 MB XLS) [file pone.0003870.s001.xls]

## Sheet: MOE430A PM-Only Model
Brain 145dpi
dChip PM Only Model
Differences greater than 1.3 fold
90% confidence
p Value < 0.05
MOE430A
probe set	gene	Accession	LocusLink	Description	Mock A	Mock B	Mock C	Mock A	Mock B	Mock C	RML A	RML B	RML C	RML A	RML B	RML C	fold change	P call % of Mocks	P call % of RMLs	p value
1426509_s_at	glial fibrillary acidic protein	BB183081	14580	gb:BB183081 /DB_XREF=gi:16270193 /DB_XREF=BB183081 /CLONE=A230103O17 /FEA=FLmRNA /CNT=19 /TID=Mm.1239.1 /TIER=Stack /STK=8 /UG=Mm.1239 /LL=14580 /UG_GENE=Gfap /UG_TITLE=glial fibrillary acidic protein /FL=gb:AF332061.1 gb:AF332062.1	933.28	936.47	939.49	P	P	P	3693.63	3000.24	2882.14	P	P	P	3.41	100	100	0.0125207
1426508_at	glial fibrillary acidic protein	BB183081	14580	gb:BB183081 /DB_XREF=gi:16270193 /DB_XREF=BB183081 /CLONE=A230103O17 /FEA=FLmRNA /CNT=19 /TID=Mm.1239.1 /TIER=Stack /STK=8 /UG=Mm.1239 /LL=14580 /UG_GENE=Gfap /UG_TITLE=glial fibrillary acidic protein /FL=gb:AF332061.1 gb:AF332062.1	1151.37	1175.52	1155.04	P	P	P	3993.4	3906.19	3723.72	P	P	P	3.34	100	100	0.000854053
1452244_at	RIKEN cDNA 6330406I15 gene	AK018128	70717	gb:AK018128.1 /DB_XREF=gi:12857703 /FEA=mRNA /CNT=92 /TID=Mm.63262.1 /TIER=Stack /STK=36 /UG=Mm.63262 /LL=70717 /UG_GENE=6330406I15Rik /UG_TITLE=RIKEN cDNA 6330406I15 gene /DEF=Mus musculus adult male medulla oblongata cDNA, RIKEN full-length enriched library, clone:6330406I15:unclassifiable, full insert sequence.	206.58	217.02	209.35	P	P	P	613.52	610.81	682.78	P	P	P	3.01	100	100	0.00335126
1418800_at	muscle, intestine and stomach expression 1	AF049660	17341	gb:AF049660.1 /DB_XREF=gi:6578125 /GEN=Mist1 /FEA=FLmRNA /CNT=47 /TID=Mm.46362.1 /TIER=FL /STK=1 /UG=Mm.46362 /LL=17341 /DEF=Mus musculus mMist1 (Mist1) mRNA, complete cds. /PROD=mMist1 /FL=gb:BC011486.1 gb:NM_010800.1 gb:AF049660.1	223.59	213.44	214.28	A	A	A	623.6	567.32	605.96	P	P	P	2.76	0	100	0.00137873
1451716_at	v-maf musculoaponeurotic fibrosarcoma oncogene family, protein B (avian)	AW412521	16658	gb:AW412521 /DB_XREF=gi:6938339 /DB_XREF=uq41h10.x1 /CLONE=IMAGE:2812003 /FEA=FLmRNA /CNT=162 /TID=Mm.67919.1 /TIER=Stack /STK=11 /UG=Mm.67919 /LL=16658 /UG_GENE=Mafb /UG_TITLE=v-maf musculoaponeurotic fibrosarcoma oncogene family, protein B (avian) /FL=gb:L36435.1 gb:BC016434.1	187.43	192.52	198.49	P	P	P	390.38	433.44	476.83	A	P	P	2.25	100	66	0.00807393
1427934_at	RIKEN cDNA 2610208E05 gene	BB284695	108755	gb:BB284695 /DB_XREF=gi:16401433 /DB_XREF=BB284695 /CLONE=A930106K21 /FEA=mRNA /CNT=68 /TID=Mm.1182.1 /TIER=Stack /STK=17 /UG=Mm.1182 /UG_TITLE=Mus musculus, Similar to hypothetical protein dJ122O8.2, clone MGC:41400 IMAGE:1446940, mRNA, complete cds	137.45	147.97	148.44	P	P	P	311.74	302.56	338.45	P	P	P	2.2	100	100	0.00349102
1424678_at	actin-like 7b	AF113520	11471	gb:AF113520.1 /DB_XREF=gi:6580805 /GEN=Actl7b /FEA=FLmRNA /CNT=38 /TID=Mm.87699.1 /TIER=FL+Stack /STK=20 /UG=Mm.87699 /LL=11471 /DEF=Mus musculus actin-like-7-beta protein (Actl7b) mRNA, complete cds. /PROD=actin-like-7-beta protein /FL=gb:AB023062.1 gb:AF113520.1	487.24	477.13	483.21	P	P	P	960.83	1090.47	1103.72	A	P	P	2.18	100	66	0.00698647
1417381_at	complement component 1, q subcomponent, alpha polypeptide	NM_007572	12259	gb:NM_007572.1 /DB_XREF=gi:6671649 /GEN=C1qa /FEA=FLmRNA /CNT=119 /TID=Mm.370.1 /TIER=FL+Stack /STK=46 /UG=Mm.370 /LL=12259 /DEF=Mus musculus complement component 1, q subcomponent, alpha polypeptide (C1qa), mRNA. /PROD=complement component 1, q subcomponent, alphapolypeptide /FL=gb:BC002086.1 gb:NM_007572.1	755.04	744.11	747.46	P	P	P	1806.72	1607.39	1450.55	P	P	P	2.17	100	100	0.0130649
1417080_a_at	signaling intermediate in Toll pathway-evolutionarily conserved	NM_012029	26940	gb:NM_012029.1 /DB_XREF=gi:6755521 /GEN=Sitpec-pending /FEA=FLmRNA /CNT=66 /TID=Mm.29790.1 /TIER=FL+Stack /STK=58 /UG=Mm.29790 /LL=26940 /DEF=Mus musculus signaling intermediate in Toll pathway-evolutionarily conserved (Sitpec-pending), mRNA. /PROD=signaling intermediate in Tollpathway-evolutionarily conserved /FL=gb:AF182510.1 gb:NM_012029.1	376.3	377.44	376.82	P	P	P	841.02	775.65	793.73	P	P	P	2.13	100	100	0.00214785
1426267_at	RIKEN cDNA 2010001H09 gene	BB417508	67106	gb:BB417508 /DB_XREF=gi:16423378 /DB_XREF=BB417508 /CLONE=C530003O14 /FEA=FLmRNA /CNT=37 /TID=Mm.36575.1 /TIER=ConsEnd /STK=2 /UG=Mm.36575 /LL=67106 /UG_GENE=2010001H09Rik /UG_TITLE=RIKEN cDNA 2010001H09 gene /FL=gb:AY071852.1	11.55	16.79	16.96	P	P	P	29.93	31.02	32.62	P	P	A	2.07	100	66	0.00567364
1419768_at	CD22 antigen	NM_009845	12483	gb:NM_009845.1 /DB_XREF=gi:6753339 /GEN=Cd22 /FEA=FLmRNA /CNT=19 /TID=Mm.1708.1 /TIER=FL /STK=6 /UG=Mm.1708 /LL=12483 /DEF=Mus musculus CD22 antigen (Cd22), mRNA. /PROD=CD22 antigen /FL=gb:AF102134.1 gb:NM_009845.1 gb:L16928.1	83.99	46.11	81.23	A	A	A	151.4	125.37	150.98	P	P	P	2.02	0	100	0.00251344
1449401_at	complement component 1, q subcomponent, gamma polypeptide	NM_007574	12262	gb:NM_007574.1 /DB_XREF=gi:6671651 /GEN=C1qc /FEA=FLmRNA /CNT=46 /TID=Mm.3453.1 /TIER=FL+Stack /STK=11 /UG=Mm.3453 /LL=12262 /DEF=Mus musculus complement component 1, q subcomponent, c polypeptide (C1qc), mRNA. /PROD=complement component 1, q subcomponent, cpolypeptide /FL=gb:NM_007574.1	675.02	675.27	666.89	P	P	P	1308.22	1391.34	1265.53	P	P	P	1.97	100	100	0.00286712
1419100_at	serine (or cysteine) proteinase inhibitor, clade A, member 3N	NM_009252	20716	gb:NM_009252.1 /DB_XREF=gi:6678092 /GEN=Spi2-2 /FEA=FLmRNA /CNT=61 /TID=Mm.22650.1 /TIER=FL+Stack /STK=13 /UG=Mm.22650 /LL=20716 /DEF=Mus musculus serine protease inhibitor 2-2 (Spi2-2), mRNA. /PROD=serine protease inhibitor 2-2 /FL=gb:NM_009252.1 gb:M64086.1 gb:BC013651.1	469.19	462.75	473.88	A	A	A	957.95	915.65	880.48	P	P	P	1.96	0	100	0.00278835
1436845_at	axin2	BB398993	12006	gb:BB398993 /DB_XREF=gi:15411724 /DB_XREF=BB398993 /CLONE=C330012C04 /FEA=EST /CNT=49 /TID=Mm.71710.2 /TIER=Stack /STK=44 /UG=Mm.71710 /LL=12006 /UG_GENE=Axin2 /UG_TITLE=axin2	428.63	429.6	419.65	P	P	P	827.64	785.08	847.84	P	P	P	1.93	100	100	0.00285925
1417876_at	Fc receptor, IgG, high affinity I	AF143181	14129	gb:AF143181.1 /DB_XREF=gi:4973127 /GEN=Fcgr1 /FEA=FLmRNA /CNT=56 /TID=Mm.150.1 /TIER=FL+Stack /STK=34 /UG=Mm.150 /LL=14129 /DEF=Mus musculus strain ABH (Biozzi) high affinity immunoglobulin gamma Fc receptor I (Fcgr1) mRNA, Fcgr1-d allele, complete cds. /PROD=high affinity immunoglobulin gamma Fc receptorI /FL=gb:AF143169.1 gb:AF143168.1 gb:AF143162.1 gb:AF143161.1 gb:AF143160.1 gb:AF143159.1 gb:…	42.48	36.66	39.89	A	A	A	71.57	76.14	80.59	P	P	P	1.92	0	100	0.0100733
1436542_at	prostaglandin E receptor 1 (subtype EP1), 42kD	BE948730	19216	gb:BE948730 /DB_XREF=gi:10526489 /DB_XREF=UI-M-BH3-avj-a-05-0-UI.s1 /CLONE=UI-M-BH3-avj-a-05-0-UI /FEA=EST /CNT=26 /TID=Mm.213000.2 /TIER=Stack /STK=8 /UG=Mm.213000 /LL=19216 /UG_GENE=Ptger1 /UG_TITLE=prostaglandin E receptor 1 (subtype EP1), 42kD	535.7	535.77	543.33	P	P	P	1006.05	1006.83	1077.19	P	P	P	1.91	100	100	0.00182777
1418021_at	complement component 4 (within H-2S)	NM_009780	12268	gb:NM_009780.1 /DB_XREF=gi:6753225 /GEN=C4 /FEA=FLmRNA /CNT=175 /TID=Mm.16106.1 /TIER=FL+Stack /STK=31 /UG=Mm.16106 /LL=12268 /DEF=Mus musculus complement component 4 (within H-2S) (C4), mRNA. /PROD=complement component 4 (within H-2S) /FL=gb:M21576.1 gb:M12384.1 gb:M11729.1 gb:NM_009780.1	808.71	807.76	783.88	P	P	P	1670.72	1436.2	1425.12	P	P	P	1.89	100	100	0.011193
1422903_at	lymphocyte antigen 86	NM_010745	17084	gb:NM_010745.1 /DB_XREF=gi:6754587 /GEN=Ly86 /FEA=FLmRNA /CNT=37 /TID=Mm.2639.1 /TIER=FL+Stack /STK=8 /UG=Mm.2639 /LL=17084 /DEF=Mus musculus lymphocyte antigen 86 (Ly86), mRNA. /PROD=lymphocyte antigen 86 /FL=gb:AB007599.1 gb:NM_010745.1	459.09	473.78	468.31	P	P	P	824.69	839.92	804.81	P	P	P	1.76	100	100	0.000755245
1448380_at	peptidylprolyl isomerase C-associated protein	NM_011150	19039	gb:NM_011150.1 /DB_XREF=gi:6755143 /GEN=Ppicap /FEA=FLmRNA /CNT=229 /TID=Mm.3152.1 /TIER=FL+Stack /STK=83 /UG=Mm.3152 /LL=19039 /DEF=Mus musculus peptidylprolyl isomerase C-associated protein (Ppicap), mRNA. /PROD=peptidylprolyl isomerase C-associated protein /FL=gb:L16894.1 gb:NM_011150.1	412.04	415.41	421.51	P	P	P	726.66	682.78	690.05	P	P	P	1.68	100	100	0.00299814
1451683_x_at	histocompatibility 2, L region	M34962	14980	gb:M34962.1 /DB_XREF=gi:199422 /GEN=MHC H-2Dr /FEA=FLmRNA /CNT=23 /TID=Mm.196214.1 /TIER=FL /STK=2 /UG=Mm.196214 /LL=14980 /UG_TITLE=histocompatibility 2, L region /DEF=Mus musculus MHC class I H-2Ds protein mRNA, complete cds. /FL=gb:M34961.1 gb:M34962.1	190.12	194.06	191.89	P	P	P	339.42	309.18	308.13	P	P	P	1.66	100	100	0.00771672
1449289_a_at	beta-2 microglobulin	NM_009735	12010	gb:NM_009735.1 /DB_XREF=gi:6753155 /GEN=B2m /FEA=FLmRNA /CNT=238 /TID=Mm.163.1 /TIER=FL+Stack /STK=15 /UG=Mm.163 /LL=12010 /DEF=Mus musculus beta-2 microglobulin (B2m), mRNA. /PROD=beta-2 microglobulin /FL=gb:NM_009735.1	1079.3	1069.82	1074.78	P	P	P	1869.31	1811.8	1642.42	P	P	P	1.65	100	100	0.00918908
1427847_at	runt related transcription factor 1	AB046930	12394	gb:AB046930.1 /DB_XREF=gi:9757451 /GEN=runx1 /FEA=mRNA /CNT=1 /TID=Mm.4081.4 /TIER=ConsEnd /STK=0 /UG=Mm.4081 /LL=12394 /DEF=Mus musculus runx1 mRNA, partial cds, C-terminal exon region. /PROD=Runx1	221	218.5	225.62	P	P	P	379.44	340.44	379.02	P	P	P	1.65	100	100	0.0061798
1453497_a_at	phosphatidylinositol glycan, class A	AK014488	18700	gb:AK014488.1 /DB_XREF=gi:12852378 /FEA=mRNA /CNT=11 /TID=Mm.3781.2 /TIER=ConsEnd /STK=2 /UG=Mm.3781 /LL=18700 /UG_GENE=Piga /UG_TITLE=phosphatidylinositol glycan, class A /DEF=Mus musculus 14 days embryo liver cDNA, RIKEN full-length enriched library, clone:4432411L20:phosphatidylinositol glycan, class A, full insert sequence.	204.5	195.53	197.1	P	P	P	334.84	294.05	333.23	P	P	P	1.61	100	100	0.00910907
1430698_a_at	RIKEN cDNA 4930513H15 gene	AK017107	75821	gb:AK017107.1 /DB_XREF=gi:12856197 /FEA=mRNA /CNT=6 /TID=Mm.87637.2 /TIER=ConsEnd /STK=1 /UG=Mm.87637 /LL=75821 /UG_GENE=4930513H15Rik /UG_TITLE=RIKEN cDNA 4930513H15 gene /DEF=Mus musculus adult male testis cDNA, RIKEN full-length enriched library, clone:4933438D16:homolog to PIBF1 PROTEIN, full insert sequence.	23.68	24.34	23.7	P	P	P	38.52	43.54	33.68	P	P	P	1.61	100	100	0.0313918
1437548_at	bicaudal D homolog 1 (Drosophila)	AV367839	12121	gb:AV367839 /DB_XREF=gi:16397715 /DB_XREF=AV367839 /CLONE=8430438G19 /FEA=EST /CNT=28 /TID=Mm.132482.3 /TIER=Stack /STK=16 /UG=Mm.132482 /LL=12121 /UG_GENE=Bicd1 /UG_TITLE=bicaudal D homolog 1 (Drosophila)	173.53	171.54	176.78	P	P	P	264.15	308.95	257.23	P	P	P	1.59	100	100	0.0278829
1437874_s_at	hexosaminidase B	AV225808	15212	gb:AV225808 /DB_XREF=gi:6177123 /DB_XREF=AV225808 /CLONE=3830432A03 /FEA=EST /CNT=20 /TID=Mm.219675.2 /TIER=Stack /STK=13 /UG=Mm.219675 /UG_TITLE=Mus musculus, Similar to elongation factor G2, clone MGC:28160 IMAGE:3984129, mRNA, complete cds	543.35	538.45	540.82	P	P	P	929.49	850.16	798.67	P	P	P	1.59	100	100	0.0133579
1450792_at	TYRO protein tyrosine kinase binding protein	NM_011662	22177	gb:NM_011662.1 /DB_XREF=gi:6755914 /GEN=Tyrobp /FEA=FLmRNA /CNT=23 /TID=Mm.46301.1 /TIER=FL /STK=5 /UG=Mm.46301 /LL=22177 /DEF=Mus musculus TYRO protein tyrosine kinase binding protein (Tyrobp), mRNA. /PROD=TYRO protein tyrosine kinase binding protein /FL=gb:NM_011662.1 gb:AF024637.1 gb:AF077829.1	527.28	531.95	521.5	P	P	P	840.93	840.19	807.4	P	P	P	1.57	100	100	0.000786859
1427275_at	RIKEN cDNA 2500002A22 gene	BI665051	70099	gb:BI665051 /DB_XREF=gi:15579271 /DB_XREF=603287509F1 /CLONE=IMAGE:5321378 /FEA=mRNA /CNT=93 /TID=Mm.192224.2 /TIER=Stack /STK=15 /UG=Mm.192224 /LL=22695 /UG_GENE=Zfp36 /UG_TITLE=zinc finger protein 36	143.33	139.64	151.72	P	P	P	213.92	230.3	231.9	P	P	A	1.56	100	66	0.0051463
1427746_x_at	histocompatibility 2, K region	S70184	14972	gb:S70184.1 /DB_XREF=gi:546340 /GEN=MHC I /FEA=mRNA /CNT=1 /TID=Mm.16771.5 /TIER=ConsEnd /STK=0 /UG=Mm.16771 /LL=14972 /DEF=MHC I=H-2Kd homolog {alternatively spliced, deletion of exon 3} (mice, DBA2, L1210 lymphoma, mRNA Mutant, 855 nt). /PROD=class I major histocompatibility antigen H-2Kd	433.69	440.75	436.79	P	P	P	674.35	653.85	717.64	P	P	A	1.56	100	66	0.0063913
1448591_at	cathepsin S	NM_021281	13040	gb:NM_021281.1 /DB_XREF=gi:10946581 /GEN=Ctss /FEA=FLmRNA /CNT=157 /TID=Mm.3619.1 /TIER=FL+Stack /STK=56 /UG=Mm.3619 /LL=13040 /DEF=Mus musculus cathepsin S (Ctss), mRNA. /PROD=cathepsin S /FL=gb:NM_021281.1 gb:BC002125.1 gb:AF038546.1	1114.05	1127.39	1125.6	P	P	P	1830.1	1660.28	1714.54	P	P	P	1.55	100	100	0.00773195
1425382_a_at	aquaporin 4	U48399	11829	gb:U48399.1 /DB_XREF=gi:1808953 /GEN=mMIWC3 /FEA=FLmRNA /CNT=7 /TID=Mm.184351.1 /TIER=FL /STK=2 /UG=Mm.184351 /LL=11829 /DEF=Mus musculus mercurial-insensitive water channel 3 (mMIWC3) mRNA, complete cds. /PROD=mercurial-insensitive water channel 3 /FL=gb:U48398.1 gb:U48399.1	1029.21	1007.36	1011.87	P	P	P	1704.21	1517.28	1468.15	P	P	P	1.54	100	100	0.0141662
1452428_a_at	beta-2 microglobulin	AI099111	12010	gb:AI099111 /DB_XREF=gi:3448636 /DB_XREF=ue39f04.y1 /CLONE=IMAGE:1482751 /FEA=mRNA /CNT=26 /TID=Mm.163.2 /TIER=ConsEnd /STK=0 /UG=Mm.163 /LL=12010 /UG_GENE=B2m /UG_TITLE=beta-2 microglobulin	1866.58	1858.08	1873.89	P	P	P	3101.83	2809.44	2718.15	P	P	P	1.54	100	100	0.013071
1451784_x_at	histocompatibility 2, D region locus 1	L36068	14964	gb:L36068.1 /DB_XREF=gi:797271 /GEN=H2-D /FEA=FLmRNA /CNT=10 /TID=Mm.33263.4 /TIER=FL /STK=1 /UG=Mm.33263 /LL=14964 /DEF=Mus musculus MHC class I H2G7 D mRNA, complete cds. /PROD=cell surface glycoprotein /FL=gb:L36068.1	1162.33	1187.1	1172.26	P	P	P	1974.19	1747.79	1680.24	P	P	P	1.53	100	100	0.0216449
1448667_x_at	Mus musculus molossinus unknown mRNA	AV174616		gb:AV174616 /DB_XREF=gi:15404733 /DB_XREF=AV174616 /CLONE=5730411G05 /FEA=FLmRNA /CNT=285 /TID=Mm.31533.1 /TIER=Stack /STK=150 /UG=Mm.31533 /LL=57259 /UG_GENE=Tob2 /UG_TITLE=transducer of ERBB2, 2 /FL=gb:NM_020507.1 gb:BC011163.1	474.35	479.43	481.8	P	P	P	682	717.58	777.23	P	P	P	1.52	100	100	0.0106714
1421378_s_at	ATP-binding cassette, sub-family C (CFTR/MRP), member 1	NM_008576	17250	gb:NM_008576.1 /DB_XREF=gi:6678847 /GEN=Abcc1a /FEA=FLmRNA /CNT=15 /TID=Mm.89956.1 /TIER=FL /STK=2 /UG=Mm.89956 /LL=17250 /DEF=Mus musculus ATP-binding cassette, sub-family C (CFTRMRP), member 1a (Abcc1a), mRNA. /PROD=ATP-binding cassette, sub-family C, member 1a /FL=gb:AF022908.1 gb:NM_008576.1	516.67	491.74	504.96	P	P	P	749.35	785.3	761.39	P	P	P	1.52	100	100	0.0045793
1450779_at	fatty acid binding protein 7, brain	NM_021272	12140	gb:NM_021272.1 /DB_XREF=gi:10946571 /GEN=Fabp7 /FEA=FLmRNA /CNT=58 /TID=Mm.3644.1 /TIER=FL+Stack /STK=9 /UG=Mm.3644 /LL=12140 /DEF=Mus musculus fatty acid binding protein 7, brain (Fabp7), mRNA. /PROD=brain lipid binding protein /FL=gb:NM_021272.1	782.97	781.51	774.69	P	P	P	1257.82	1223.85	1081.5	P	P	P	1.52	100	100	0.0155372
1434380_at	ESTs, Weakly similar to lysophospholipase 1; phospholipase 1a; lysophopholipase 1 [Mus musculus] [M.musculus]	BM241271		gb:BM241271 /DB_XREF=gi:17876541 /DB_XREF=K0614F09-3 /CLONE=K0614F09 /FEA=EST /CNT=67 /TID=Mm.532.1 /TIER=Stack /STK=33 /UG=Mm.532 /UG_TITLE=ESTs, Weakly similar to A Chain A, Crystal Structure Of The Human Acyl Protein Thioesterase 1 At 1.5 A Resolution (H.sapiens)	238.14	239.45	234.7	P	P	P	346.14	342.18	394.09	P	P	P	1.52	100	100	0.0207913
1425336_x_at	histocompatibility 2, K region	BC011306	14972	gb:BC011306.1 /DB_XREF=gi:15030108 /FEA=FLmRNA /CNT=38 /TID=Mm.16771.2 /TIER=FL /STK=2 /UG=Mm.16771 /LL=14972 /UG_GENE=H2-K /DEF=Mus musculus, clone MGC:7052 IMAGE:3156482, mRNA, complete cds. /PROD=Unknown (protein for MGC:7052) /FL=gb:BC011306.1	923.47	936.83	941.93	P	P	P	1496.02	1402.35	1341.89	P	P	P	1.51	100	100	0.0108326
1425545_x_at	histocompatibility 2, D region locus 1	M86502	14964	gb:M86502.1 /DB_XREF=gi:199306 /GEN=H-2Df /FEA=FLmRNA /CNT=31 /TID=Mm.33263.2 /TIER=FL /STK=1 /UG=Mm.33263 /LL=14964 /DEF=Mus musculus MHC class I protein (H-2Df) mRNA, complete cds. /PROD=MHC class I-alpha /FL=gb:U47325.1 gb:M86502.1 gb:M69067.1	1255.02	1248.56	1260.28	P	P	P	2014.28	1780.12	1879.65	P	P	P	1.51	100	100	0.0106696
1427076_at	macrophage expressed gene 1	L20315	17476	gb:L20315.1 /DB_XREF=gi:431419 /FEA=mRNA /CNT=92 /TID=Mm.3999.1 /TIER=Stack /STK=19 /UG=Mm.3999 /LL=17476 /UG_GENE=Mpeg1 /DEF=Mus musculus MPS1 gene and mRNA, 3end. /PROD=MPS1 protein	410.39	400.74	405.92	P	P	P	608.26	611.69	597.86	P	P	P	1.49	100	100	0.000785457
1429650_at	RIKEN cDNA 2310004N11 gene	AV091811	74178	gb:AV091811 /DB_XREF=gi:16381588 /DB_XREF=AV091811 /CLONE=2310065M20 /FEA=mRNA /CNT=88 /TID=Mm.22193.1 /TIER=Stack /STK=11 /UG=Mm.22193 /LL=74178 /UG_GENE=2310004N11Rik /UG_TITLE=RIKEN cDNA 2310004N11 gene	711.94	688.88	694.98	P	P	P	994.3	1040.48	1084.59	P	P	P	1.49	100	100	0.00836088
1421641_at	solute carrier family 6 (neurotransmitter transporter, noradrenalin), member 2	NM_009209	20538	gb:NM_009209.1 /DB_XREF=gi:6678024 /GEN=Slc6a2 /FEA=FLmRNA /CNT=3 /TID=Mm.57040.1 /TIER=FL /STK=2 /UG=Mm.57040 /LL=20538 /DEF=Mus musculus solute carrier family 6 (neurotransmitter transporter, noradrenalin), member 2 (Slc6a2), mRNA. /PROD=solute carrier family 6 (neurotransmittertransporter, noradrenalin), member 2 /FL=gb:U76306.1 gb:NM_009209.1	351.3	354.36	361.43	P	P	P	513.78	499.62	561.8	P	P	P	1.48	100	100	0.00911049
1434449_at	aquaporin 4	BB193413	11829	gb:BB193413 /DB_XREF=gi:16270835 /DB_XREF=BB193413 /CLONE=A330077C20 /FEA=EST /CNT=49 /TID=Mm.184351.5 /TIER=Stack /STK=32 /UG=Mm.184351 /LL=11829 /UG_GENE=Aqp4 /UG_TITLE=aquaporin 4	847.9	870.72	851.84	P	P	P	1283.26	1297.83	1215.13	P	P	P	1.48	100	100	0.00309216
1420895_at	transforming growth factor, beta receptor I	BM248342	21812	gb:BM248342 /DB_XREF=gi:17883612 /DB_XREF=K0815D01-3 /CLONE=K0815D01 /FEA=FLmRNA /CNT=110 /TID=Mm.197552.1 /TIER=Stack /STK=57 /UG=Mm.197552 /LL=21812 /UG_GENE=Tgfbr1 /UG_TITLE=transforming growth factor, beta receptor I /FL=gb:D28526.1 gb:NM_009370.1 gb:D25540.1	304.6	305.42	313.86	P	P	P	481.43	406.09	464.29	P	P	P	1.46	100	100	0.0236356
1426499_at	SH3-containing protein SH3GLB2	AI481067	227700	gb:AI481067 /DB_XREF=gi:4374293 /DB_XREF=vf92c07.x1 /CLONE=IMAGE:851244 /FEA=FLmRNA /CNT=141 /TID=Mm.33343.1 /TIER=Stack /STK=8 /UG=Mm.33343 /UG_TITLE=Mus musculus SH3GLB2 mRNA, complete cds /FL=gb:AF426314.1 gb:BC024477.1	1160.85	1142.32	1144.42	P	P	P	1626.66	1664.77	1727.12	P	P	P	1.46	100	100	0.00412789
1420483_at	cyclin M3	BB069607	94218	gb:BB069607 /DB_XREF=gi:16260040 /DB_XREF=BB069607 /CLONE=8030485C20 /FEA=FLmRNA /CNT=168 /TID=Mm.44492.1 /TIER=ConsEnd /STK=2 /UG=Mm.44492 /LL=94218 /UG_GENE=Cnnm3 /UG_TITLE=cyclin M3 /FL=gb:NM_053186.1 gb:AF216964.1	709.64	724.52	713.56	A	A	A	967.08	1079.25	1068.99	P	P	P	1.45	0	100	0.0100302
1451993_at	RIKEN cDNA 9130404D08 gene	BI730405	74549	gb:BI730405 /DB_XREF=gi:15707418 /DB_XREF=603350717F1 /CLONE=IMAGE:5358220 /FEA=FLmRNA /CNT=58 /TID=Mm.103542.1 /TIER=ConsEnd /STK=0 /UG=Mm.103542 /LL=74549 /UG_GENE=9130404D08Rik /UG_TITLE=RIKEN cDNA 9130404D08 gene /FL=gb:BC023401.1	671.96	657.26	655.48	P	P	P	944.73	940.12	989.28	P	P	P	1.45	100	100	0.00403403
1422509_at	U2 small nuclear ribonucleoprotein auxiliary factor (U2AF)	NM_024187	108121	gb:NM_024187.1 /DB_XREF=gi:17530979 /GEN=U2af1 /FEA=FLmRNA /CNT=106 /TID=Mm.144028.1 /TIER=FL+Stack /STK=62 /UG=Mm.144028 /LL=108121 /DEF=Mus musculus U2 small nuclear ribonucleoprotein auxiliary factor (U2AF),35 kDa (U2af1), mRNA. /PROD=U2 small nuclear ribonucleoprotein auxiliaryfactor (U2AF),35 kDa /FL=gb:NM_024187.1	1219.14	1210.23	1210.96	P	P	P	1684.31	1735.01	1815.16	P	P	P	1.44	100	100	0.00569413
1428055_at	Mus musculus cDNA for MBII-343 snoRNA.	AB076245		gb:AB076245.1 /DB_XREF=gi:20330513 /FEA=mRNA /CNT=1 /TID=Mm.220172.1 /TIER=ConsEnd /STK=0 /UG=Mm.220172 /UG_TITLE=Mus musculus cDNA for MBII-343 snoRNA /DEF=Mus musculus cDNA for MBII-343 snoRNA.	508.12	525.85	514.76	P	P	P	738.99	750.58	723.42	P	P	P	1.43	100	100	0.00089313
1424948_x_at	histocompatibility 2, K region	L23495	14972	gb:L23495.1 /DB_XREF=gi:405529 /GEN=H-2K /FEA=FLmRNA /CNT=87 /TID=Mm.16771.1 /TIER=FL+Stack /STK=10 /UG=Mm.16771 /LL=14972 /DEF=Mus musculus MHC class I H-2K mRNA, complete cds, haplotype u. /PROD=MHC H-2K antigen /FL=gb:U47329.1 gb:U47328.1 gb:L36309.1 gb:L36308.1 gb:L36307.1 gb:L36306.1 gb:J00402.1 gb:L23495.1 gb:M69071.1 gb:L36312.1 gb:L36311.1 gb:L36310.1 gb:M69073.1 gb:M69072.1 gb:L36065.1 g…	337.68	337.42	346.23	P	P	P	484.96	521.01	441.39	P	P	P	1.42	100	100	0.0311401
1448749_at	pleckstrin	AF181829	56193	gb:AF181829.1 /DB_XREF=gi:8515108 /GEN=Plek /FEA=FLmRNA /CNT=79 /TID=Mm.98232.1 /TIER=FL /STK=1 /UG=Mm.98232 /LL=56193 /DEF=Mus musculus pleckstrin (Plek) mRNA, complete cds. /PROD=pleckstrin /FL=gb:AF181829.1 gb:NM_019549.1 gb:AF303745.1 gb:AF073294.1	168.21	171.35	170.69	P	P	P	231.67	249.59	238.8	P	P	P	1.41	100	100	0.00386981
1449863_a_at	distal-less homeobox 5	NM_010056	13395	gb:NM_010056.1 /DB_XREF=gi:7106292 /GEN=Dlx5 /FEA=FLmRNA /CNT=10 /TID=Mm.4873.1 /TIER=FL /STK=5 /UG=Mm.4873 /LL=13395 /DEF=Mus musculus distal-less homeobox 5 (Dlx5), mRNA. /PROD=distal-less homeobox 5 /FL=gb:AF022077.1 gb:AF072453.1 gb:NM_010056.1	328.73	326.88	323.23	P	P	P	434.48	455.33	485.89	P	P	P	1.41	100	100	0.0152758
1451931_x_at	histocompatibility 2, D region locus 1	M69068	14964	gb:M69068.1 /DB_XREF=gi:199791 /FEA=FLmRNA /CNT=1 /TID=Mm.33263.5 /TIER=FL /STK=1 /UG=Mm.33263 /LL=14964 /UG_GENE=H2-D1 /DEF=Mus musculus mRNA, complete cds. /PROD=unnamed /FL=gb:M69068.1	902.91	909.45	921.5	P	P	P	1322.74	1189.19	1335.5	P	P	P	1.41	100	100	0.0148573
1449025_at	interferon-induced protein with tetratricopeptide repeats 3	NM_010501	15959	gb:NM_010501.1 /DB_XREF=gi:6754287 /GEN=Ifit3 /FEA=FLmRNA /CNT=51 /TID=Mm.951.1 /TIER=FL+Stack /STK=26 /UG=Mm.951 /LL=15959 /DEF=Mus musculus interferon-induced protein with tetratricopeptide repeats 3 (Ifit3), mRNA. /PROD=interferon-induced protein withtetratricopeptide repeats 3 /FL=gb:NM_010501.1 gb:L32974.1 gb:BC003804.1	485.233	478.435	485.97	P	P	P	772.536	629.551	640.93	P	P	P	1.41	100	100	0.0476
1451537_at	chitinase 3-like 1	BC005611	12654	gb:BC005611.1 /DB_XREF=gi:13542819 /FEA=FLmRNA /CNT=80 /TID=Mm.4376.1 /TIER=FL+Stack /STK=10 /UG=Mm.4376 /LL=12654 /UG_GENE=Chi3l1 /DEF=Mus musculus, Similar to chitinase 3-like 1 (cartilage glycoprotein-39), clone MGC:7884 IMAGE:3582304, mRNA, complete cds. /PROD=Similar to chitinase 3-like 1 (cartilageglycoprotein-39) /FL=gb:BC005611.1 gb:BC003780.1 gb:BC004734.1	226.42	227.53	233.02	A	A	A	321.69	314.4	325.79	P	P	P	1.4	0	100	0.00073765
1423555_a_at	expressed sequence AW261460	BB329808	99899	gb:BB329808 /DB_XREF=gi:15411519 /DB_XREF=BB329808 /CLONE=B630019O10 /FEA=FLmRNA /CNT=51 /TID=Mm.30756.1 /TIER=Stack /STK=11 /UG=Mm.30756 /LL=99899 /UG_GENE=AW261460 /UG_TITLE=expressed sequence AW261460 /FL=gb:NM_133871.1	87.97	90.95	90.53	P	P	P	118.84	125.62	131.89	A	P	P	1.4	100	66	0.00732346
1424708_at	RIKEN cDNA 1110014C03 gene	BI409239	68581	gb:BI409239 /DB_XREF=gi:15170162 /DB_XREF=602961213F1 /CLONE=IMAGE:5116875 /FEA=FLmRNA /CNT=348 /TID=Mm.18688.1 /TIER=Stack /STK=17 /UG=Mm.18688 /LL=68581 /UG_GENE=1110014C03Rik /UG_TITLE=RIKEN cDNA 1110014C03 gene /FL=gb:BC002182.1 gb:BC006774.1	1017.46	996.64	1006.32	P	P	P	1490.04	1378.77	1356.36	P	P	P	1.4	100	100	0.00824291
1460218_at	CD52 antigen	NM_013706	23833	gb:NM_013706.1 /DB_XREF=gi:14719423 /GEN=Cd52 /FEA=FLmRNA /CNT=59 /TID=Mm.24130.1 /TIER=FL+Stack /STK=33 /UG=Mm.24130 /LL=23833 /DEF=Mus musculus CD52 antigen (Cd52), mRNA. /PROD=CD52 antigen /FL=gb:NM_013706.1 gb:M55561.1	302.24	299.74	308.12	P	A	A	416.66	423.51	423.46	P	P	P	1.39	33	100	0.000636811
1448891_at	macrophage scavenger receptor 2	BC016551	80891	gb:BC016551.1 /DB_XREF=gi:16741468 /FEA=FLmRNA /CNT=73 /TID=Mm.45173.1 /TIER=FL+Stack /STK=33 /UG=Mm.45173 /LL=80891 /UG_GENE=Msr2 /DEF=Mus musculus, macrophage scavenger receptor 2, clone MGC:28009 IMAGE:3602803, mRNA, complete cds. /PROD=macrophage scavenger receptor 2 /FL=gb:NM_030707.1 gb:AF329486.1 gb:BC016551.1 gb:AF302046.1 gb:AB028174.1	545.41	537.91	540.57	P	P	P	714.87	736.49	800.02	P	P	P	1.39	100	100	0.0156884
1418365_at	cathepsin H	NM_007801	13036	gb:NM_007801.1 /DB_XREF=gi:7106278 /GEN=Ctsh /FEA=FLmRNA /CNT=133 /TID=Mm.2277.1 /TIER=FL+Stack /STK=24 /UG=Mm.2277 /LL=13036 /DEF=Mus musculus cathepsin H (Ctsh), mRNA. /PROD=cathepsin H /FL=gb:U06119.1 gb:BC006878.1 gb:NM_007801.1	277.39	277.36	273.93	P	P	P	398.74	372.08	382.44	P	P	P	1.39	100	100	0.00501267
1419665_a_at	nuclear protein 1	NM_019738	56312	gb:NM_019738.1 /DB_XREF=gi:9790144 /GEN=Nupr1 /FEA=FLmRNA /CNT=28 /TID=Mm.18742.1 /TIER=FL /STK=7 /UG=Mm.18742 /LL=56312 /DEF=Mus musculus nuclear protein 1 (Nupr1), mRNA. /PROD=p8 protein /FL=gb:AF131196.1 gb:NM_019738.1 gb:BC002109.1	181.28	174.56	176.5	A	A	A	244.69	241.17	251.65	P	P	P	1.39	0	100	0.00261473
1416041_at	serum/glucocorticoid regulated kinase	NM_011361	20393	gb:NM_011361.1 /DB_XREF=gi:6755489 /GEN=Sgk /FEA=FLmRNA /CNT=280 /TID=Mm.28405.1 /TIER=FL+Stack /STK=139 /UG=Mm.28405 /LL=20393 /DEF=Mus musculus serumglucocorticoid regulated kinase (Sgk), mRNA. /PROD=serumglucocorticoid regulated kinase /FL=gb:NM_011361.1 gb:AF205855.1 gb:AF139638.1 gb:BC005720.1	202.64	191.97	198.61	P	P	P	288.02	271.53	259.04	P	P	P	1.38	100	100	0.00991456
1422124_a_at	protein tyrosine phosphatase, receptor type, C	NM_011210	19264	gb:NM_011210.1 /DB_XREF=gi:6755243 /GEN=Ptprc /FEA=FLmRNA /CNT=6 /TID=Mm.143846.1 /TIER=FL /STK=1 /UG=Mm.143846 /LL=19264 /DEF=Mus musculus protein tyrosine phosphatase, receptor type, C (Ptprc), mRNA. /PROD=protein tyrosine phosphatase, receptor type, C /FL=gb:NM_011210.1	107.47	114.74	107.61	P	P	P	145.59	157.23	153.48	P	P	P	1.38	100	100	0.00281927
1423531_a_at	heterogeneous nuclear ribonucleoprotein A1	BI663320	15382	gb:BI663320 /DB_XREF=gi:15577553 /DB_XREF=603287369F1 /CLONE=IMAGE:5321561 /FEA=FLmRNA /CNT=378 /TID=Mm.27927.1 /TIER=Stack /STK=12 /UG=Mm.27927 /LL=15382 /UG_GENE=Hnrpa1 /UG_TITLE=heterogeneous nuclear ribonucleoprotein A1 /FL=gb:M99167.1 gb:NM_010447.1 gb:D86729.1	265.47	275.42	271.25	P	P	P	387.96	377.52	353.92	P	P	P	1.38	100	100	0.0123658
1438629_x_at	granulin	AV166504	14824	gb:AV166504 /DB_XREF=gi:5372941 /DB_XREF=AV166504 /CLONE=3110045M21 /FEA=EST /CNT=10 /TID=Mm.1568.2 /TIER=Stack /STK=10 /UG=Mm.1568 /LL=14824 /UG_GENE=Grn /UG_TITLE=granulin	1132.06	1159.54	1139.83	P	P	P	1623.43	1553.52	1511.39	P	P	P	1.37	100	100	0.0076161
1423233_at	CCAAT/enhancer binding protein (C/EBP), delta	BB831146	12609	gb:BB831146 /DB_XREF=gi:17009389 /DB_XREF=BB831146 /CLONE=G930015F03 /FEA=FLmRNA /CNT=34 /TID=Mm.4639.1 /TIER=Stack /STK=25 /UG=Mm.4639 /LL=12609 /UG_GENE=Cebpd /UG_TITLE=CCAATenhancer binding protein (CEBP), delta /FL=gb:NM_007679.1	132.44	133.96	132.54	P	P	P	174.08	179.53	182.67	P	P	P	1.34	100	100	0.00285899
1423648_at	protein disulfide isomerase-related protein	BC006865	71853	gb:BC006865.1 /DB_XREF=gi:13905145 /FEA=FLmRNA /CNT=356 /TID=Mm.182959.1 /TIER=FL+Stack /STK=221 /UG=Mm.182959 /LL=71853 /UG_GENE=1700015E05Rik /DEF=Mus musculus, Similar to protein disulfide isomerase-related protein, clone MGC:6472 IMAGE:2645183, mRNA, complete cds. /PROD=Similar to protein disulfide isomerase-relatedprotein /FL=gb:BC006865.1	1180.15	1183.55	1176	P	P	P	1624.64	1562.14	1561.48	P	P	P	1.34	100	100	0.00268406
1448148_at	granulin	M86736	14824	gb:M86736.1 /DB_XREF=gi:191766 /GEN=acrogranin /FEA=FLmRNA /CNT=416 /TID=Mm.1568.1 /TIER=FL+Stack /STK=168 /UG=Mm.1568 /LL=14824 /DEF=Mouse acrogranin mRNA, complete cds. /PROD=acrogranin /FL=gb:NM_008175.1 gb:M86736.1	539.7	537.63	536.07	P	P	P	713.55	723.89	714.8	P	P	P	1.33	100	100	0.000403621
1450320_at	RIKEN cDNA 4931432E15 gene	NM_027639	70991	gb:NM_027639.1 /DB_XREF=gi:13386243 /GEN=4931432E15Rik /FEA=FLmRNA /CNT=3 /TID=Mm.158524.1 /TIER=FL /STK=2 /UG=Mm.158524 /LL=70991 /DEF=Mus musculus RIKEN cDNA 4931432E15 gene (4931432E15Rik), mRNA. /PROD=RIKEN cDNA 4931432E15 /FL=gb:NM_027639.1	257.73	253.73	259.57	P	P	P	192.89	195.53	195.92	P	P	P	-1.32	100	100	0.00107719
1437165_a_at	procollagen C-proteinase enhancer protein	BB250811	18542	gb:BB250811 /DB_XREF=gi:8943557 /DB_XREF=BB250811 /CLONE=A730043A14 /FEA=EST /CNT=25 /TID=Mm.18808.3 /TIER=Stack /STK=24 /UG=Mm.18808 /LL=18542 /UG_GENE=Pcolce /UG_TITLE=procollagen C-proteinase enhancer protein	174.29	174.54	181.06	P	P	P	134.31	131.48	126.16	P	P	P	-1.35	100	100	0.00964142
1452146_a_at	RIKEN cDNA 2900026G05 gene	BC021498	226139	gb:BC021498.1 /DB_XREF=gi:18204495 /FEA=mRNA /CNT=137 /TID=Mm.213007.2 /TIER=Stack /STK=111 /UG=Mm.213007 /DEF=Mus musculus, Similar to COX15 homolog, cytochrome c oxidase assembly protein (yeast), clone IMAGE:5346284, mRNA, partial cds. /PROD=Similar to COX15 homolog, cytochrome c oxidaseassembly protein (yeast)	109.99	119.6	113.21	P	P	P	83.31	82.26	78.55	P	P	P	-1.4	100	100	0.00934084
1431295_a_at	syntaxin 18	AK016910	71116	gb:AK016910.1 /DB_XREF=gi:12855893 /FEA=mRNA /CNT=5 /TID=Mm.18959.3 /TIER=ConsEnd /STK=0 /UG=Mm.18959 /LL=71116 /UG_GENE=Stx18 /UG_TITLE=syntaxin 18 /DEF=Mus musculus adult male testis cDNA, RIKEN full-length enriched library, clone:4933425D03:syntaxin 18, full insert sequence.	118.36	118.76	122.41	P	P	P	88.91	84.75	80.92	P	P	P	-1.41	100	100	0.00991483
1450195_at	N-deacetylase/N-sulfotransferase (heparin glucosaminyl) 4	NM_022565	64580	gb:NM_022565.1 /DB_XREF=gi:12000418 /GEN=Ndst4 /FEA=FLmRNA /CNT=9 /TID=Mm.102338.1 /TIER=FL /STK=2 /UG=Mm.102338 /LL=64580 /DEF=Mus musculus N-deacetylaseN-sulfotransferase (heparin glucosaminyl) 4 (Ndst4), mRNA. /PROD=N-deacetylaseN-sulfotransferase (heparinglucosaminyl) 4 /FL=gb:NM_022565.1 gb:AB036838.1	384.44	387.32	400.24	P	P	P	297.31	257.21	269.95	P	P	P	-1.42	100	100	0.0150142
1454144_a_at	cyclin C	AK014079	51813	gb:AK014079.1 /DB_XREF=gi:12851726 /FEA=mRNA /CNT=1 /TID=Mm.4300.3 /TIER=ConsEnd /STK=0 /UG=Mm.4300 /LL=51813 /UG_GENE=Ccnc /UG_TITLE=cyclin C /DEF=Mus musculus 13 days embryo head cDNA, RIKEN full-length enriched library, clone:3110023N18:cyclin C, full insert sequence.	109.79	114.76	113.38	P	A	A	87.4	72.22	77.12	P	P	P	-1.43	33	100	0.0297627
1424716_at	trans-golgi network protein 1	BB775176	22134	gb:BB775176 /DB_XREF=gi:16935856 /DB_XREF=BB775176 /CLONE=G430023N11 /FEA=FLmRNA /CNT=80 /TID=Mm.27506.1 /TIER=ConsEnd /STK=1 /UG=Mm.27506 /LL=67442 /UG_GENE=0610039N19Rik /UG_TITLE=RIKEN cDNA 0610039N19 gene /FL=gb:BC011203.1	148.5	154.03	160.91	P	P	P	110.83	103.55	110.3	A	A	A	-1.43	100	0	0.0085003
1423556_at	aldo-keto reductase family 1, member B7	AV021656	11997	gb:AV021656 /DB_XREF=gi:4798648 /DB_XREF=AV021656 /CLONE=1190023N10 /FEA=FLmRNA /CNT=31 /TID=Mm.14460.1 /TIER=Stack /STK=11 /UG=Mm.14460 /LL=11997 /UG_GENE=Akr1b7 /UG_TITLE=aldo-keto reductase family 1, member B7 /FL=gb:J05663.1 gb:NM_009731.1	273.69	265.87	273.52	A	P	A	183.02	196.95	185.4	P	P	P	-1.44	33	100	0.00684084
1452509_at	ubiquitin specific protease 9, Y chromosome	AJ307017	107868	gb:AJ307017.1 /DB_XREF=gi:14041781 /GEN=Usp9y /FEA=mRNA /CNT=1 /TID=Mm.220151.1 /TIER=ConsEnd /STK=0 /UG=Mm.220151 /DEF=Mus musculus mRNA for putative ubiquitin-specific protease (Usp9y gene). /PROD=putative ubiquitin-specific protease	154.65	171.24	177.81	P	P	P	116.81	113.14	117.61	A	A	A	-1.45	100	0	0.0182504
1450772_at	wingless-related MMTV integration site 11	NM_009519	22411	gb:NM_009519.1 /DB_XREF=gi:6678588 /GEN=Wnt11 /FEA=FLmRNA /CNT=24 /TID=Mm.22182.1 /TIER=FL+Stack /STK=10 /UG=Mm.22182 /LL=22411 /DEF=Mus musculus wingless-related MMTV integration site 11 (Wnt11), mRNA. /PROD=wingless-related MMTV integration site 11 /FL=gb:NM_009519.1	138.55	147.15	152.9	P	P	P	111.43	93.57	92	A	P	P	-1.48	100	66	0.0441453
1426787_at	RIKEN cDNA 2310047I15 gene	AW744519	78887	gb:AW744519 /DB_XREF=gi:7656438 /DB_XREF=ur31a04.x1 /CLONE=IMAGE:3025902 /FEA=mRNA /CNT=82 /TID=Mm.219674.1 /TIER=Stack /STK=67 /UG=Mm.219674 /UG_TITLE=Mus musculus, clone IMAGE:4191452, mRNA, partial cds	173.98	172.45	176.84	P	P	P	130.93	116.17	105.08	P	P	P	-1.49	100	100	0.0205136
1418549_at	glycoprotein hormones, alpha subunit	NM_009889	12640	gb:NM_009889.1 /DB_XREF=gi:6753413 /GEN=Cga /FEA=FLmRNA /CNT=25 /TID=Mm.1361.1 /TIER=FL+Stack /STK=22 /UG=Mm.1361 /LL=12640 /DEF=Mus musculus glycoprotein hormones, alpha subunit (Cga), mRNA. /PROD=glycoprotein hormones, alpha subunit /FL=gb:AF307151.1 gb:J00643.1 gb:NM_009889.1	465.07	468.36	480.61	P	P	P	322.22	270.37	291.71	A	A	A	-1.6	100	0	0.0092139
1423600_a_at	Treacher Collins Franceschetti syndrome 1, homolog	AW209012	21453	gb:AW209012 /DB_XREF=gi:6514952 /DB_XREF=un98g03.x1 /CLONE=IMAGE:2581972 /FEA=FLmRNA /CNT=46 /TID=Mm.2215.1 /TIER=Stack /STK=9 /UG=Mm.2215 /LL=21453 /UG_GENE=Tcof1 /UG_TITLE=Treacher Collins Franceschetti syndrome 1, homolog /FL=gb:NM_011552.1 gb:AF001794.1	122.35	133.96	131.15	P	P	P	85.91	71.38	63.29	P	P	P	-1.76	100	100	0.0291656
1437848_x_at	RIKEN cDNA 2610017G09 gene	BB490673	72141	gb:BB490673 /DB_XREF=gi:9449300 /DB_XREF=BB490673 /CLONE=D530017A09 /FEA=EST /CNT=14 /TID=Mm.22456.2 /TIER=Stack /STK=14 /UG=Mm.22456 /LL=72141 /UG_GENE=2610017G09Rik /UG_TITLE=RIKEN cDNA 2610017G09 gene	120.96	136.88	136.74	P	P	P	74	74.06	75.49	A	A	A	-1.77	100	0	0.00774146
1449421_a_at	RIKEN cDNA 2200002I16 gene	NM_134110	106387	gb:NM_134110.1 /DB_XREF=gi:19882204 /GEN=2200002I16Rik /FEA=FLmRNA /CNT=17 /TID=Mm.156736.1 /TIER=FL+Stack /STK=11 /UG=Mm.156736 /LL=106387 /DEF=Mus musculus RIKEN cDNA 2200002I16 gene (2200002I16Rik), mRNA. /PROD=minK-related peptide 1 /FL=gb:NM_134110.1	233.05	234.59	239.36	P	P	P	130.49	104.67	111.35	P	P	P	-2.04	100	100	0.00534312
MOE430B
probe set	gene	Accession	LocusLink	Description	Mock A	Mock B	Mock C	Mock A	Mock B	Mock C	RML A	RML B	RML C	RML A	RML B	RML C	fold change	P call % of Mocks	P call % of RMLs	p value
1440142_s_at	glial fibrillary acidic protein	BB750040	14580	gb:BB750040 /DB_XREF=gi:16154276 /DB_XREF=BB750040 /CLONE=G130001J18 /FEA=EST /CNT=6 /TID=Mm.121857.1 /TIER=ConsEnd /STK=6 /UG=Mm.121857 /UG_TITLE=ESTs	155.28	155.43	157.48	P	P	P	583.18	584.73	511.81	P	P	P	3.59	100	100	0.00373795
1429699_at	gb:AK016905.1 /DB_XREF=gi:12855886 /FEA=mRNA /CNT=20 /TID=Mm.26989.1 /TIER=Stack /STK=10 /UG=Mm.26989 /LL=71147 /UG_GENE=4933425A18Rik /UG_TITLE=RIKEN cDNA 4933425A18 gene /DEF=Mus musculus adult male testis cDNA, RIKEN full-length enriched library, clone:4933425A18:related to 3-OXOACYL-(ACYL-CARRIER-PROTEIN) SYNTHASE II (EC 2.3.1.41) (BETA-KETOACYL-ACP SYNTHASE II) (KAS II), full insert sequence.	AK016905		gb:AK016905.1 /DB_XREF=gi:12855886 /FEA=mRNA /CNT=20 /TID=Mm.26989.1 /TIER=Stack /STK=10 /UG=Mm.26989 /LL=71147 /UG_GENE=4933425A18Rik /UG_TITLE=RIKEN cDNA 4933425A18 gene /DEF=Mus musculus adult male testis cDNA, RIKEN full-length enriched library, clone:4933425A18:related to 3-OXOACYL-(ACYL-CARRIER-PROTEIN) SYNTHASE II (EC 2.3.1.41) (BETA-KETOACYL-ACP SYNTHASE II) (KAS II), full insert sequence.	166.76	161.43	167.59	P	P	A	240.41	322.26	310.07	P	P	P	1.76	66	100	0.0418203
1434376_at	expressed sequence AW121933	AW146109	99339	gb:AW146109 /DB_XREF=gi:6167845 /DB_XREF=um37c10.x1 /CLONE=IMAGE:2247474 /FEA=EST /CNT=87 /TID=Mm.200904.1 /TIER=Stack /STK=33 /UG=Mm.200904 /LL=99339 /UG_GENE=AW146109 /UG_TITLE=expressed sequence AW146109	91.09	95.23	87.73	P	P	P	150.84	152.93	155.05	P	P	P	1.67	100	100	0.00224857
1456986_at	Mus musculus 4 days neonate male adipose cDNA, RIKEN full-length enriched library, clone:B430208D19 product:unknown EST, full insert sequence.	BB326368		gb:BB326368 /DB_XREF=gi:16403659 /DB_XREF=BB326368 /CLONE=B430208D19 /FEA=EST /CNT=6 /TID=Mm.208350.1 /TIER=ConsEnd /STK=6 /UG=Mm.208350 /UG_TITLE=ESTs	55.21	56.17	52.09	A	A	A	72.59	92.36	93.38	P	P	P	1.58	0	100	0.0490164
1443814_x_at	cathepsin H	BB542535	13036	gb:BB542535 /DB_XREF=gi:9613758 /DB_XREF=BB542535 /CLONE=E130120M24 /FEA=EST /CNT=3 /TID=Mm.209186.1 /TIER=ConsEnd /STK=3 /UG=Mm.209186 /UG_TITLE=ESTs	119.02	115.34	119.63	P	P	P	174.85	181.78	178.02	P	P	P	1.51	100	100	0.00280584
1457984_at	ESTs	BM933756		gb:BM933756 /DB_XREF=gi:19392908 /DB_XREF=UI-M-BZ1-bjs-d-12-0-UI.r2 /CLONE=UI-M-BZ1-bjs-d-12-0-UI /FEA=EST /CNT=4 /TID=Mm.93168.1 /TIER=ConsEnd /STK=3 /UG=Mm.93168 /UG_TITLE=ESTs	115.25	112.98	115.98	P	P	P	168.88	164.95	166.91	P	P	P	1.45	100	100	0.000226993
1428964_at	solute carrier family 25 (mitochondrial carrier), member 18	AK005250	71803	gb:AK005250.1 /DB_XREF=gi:12837672 /GEN=Slc25a18 /FEA=mRNA /CNT=26 /TID=Mm.101666.1 /TIER=Stack /STK=16 /UG=Mm.101666 /LL=71803 /UG_TITLE=solute carrier family 25 (mitochondrial carrier), member 18 /DEF=Mus musculus adult male cerebellum cDNA, RIKEN full-length enriched library, clone:1500015I14:solute carrier family 25, (mitochondrial carrier), member 18, full insert sequence.	686.78	689.45	669.43	P	P	P	980.47	1000.66	968.15	P	P	P	1.44	100	100	0.000298846
1456990_at	Mus musculus 0 day neonate thymus cDNA, RIKEN full-length enriched library, clone:A430015G07 product:unknown EST, full insert sequence.	BB199484		gb:BB199484 /DB_XREF=gi:16271315 /DB_XREF=BB199484 /CLONE=A430015G07 /FEA=EST /CNT=6 /TID=Mm.122405.1 /TIER=ConsEnd /STK=6 /UG=Mm.122405 /UG_TITLE=ESTs	130.21	133.61	123.09	P	P	A	167.4	189.97	193.62	P	P	P	1.42	66	100	0.0298099
1456409_at	RIKEN cDNA B230308G19 gene	BB308961	242721	gb:BB308961 /DB_XREF=gi:16402459 /DB_XREF=BB308961 /CLONE=B230308G19 /FEA=EST /CNT=37 /TID=Mm.60400.1 /TIER=Stack /STK=10 /UG=Mm.60400 /UG_TITLE=ESTs	60.58	58.74	56.6	P	A	A	79.37	81.43	87.32	P	P	P	1.41	33	100	0.0206381
1446541_at	RIKEN cDNA 4930434E21 gene	BB536995	75792	gb:BB536995 /DB_XREF=gi:16446733 /DB_XREF=BB536995 /CLONE=E130003L02 /FEA=EST /CNT=2 /TID=Mm.136919.1 /TIER=ConsEnd /STK=2 /UG=Mm.136919 /UG_TITLE=ESTs	228.48	231.41	230.4	P	P	P	312.83	317.65	314.25	P	P	P	1.37	100	100	7.36267e-05
1454757_s_at	DNA segment, Chr 12, ERATO Doi 647, expressed	AW554405	52668	gb:AW554405 /DB_XREF=gi:7199840 /DB_XREF=L0240D11-3 /CLONE=L0240D11 /FEA=EST /CNT=89 /TID=Mm.2121.2 /TIER=Stack /STK=53 /UG=Mm.2121 /LL=68627 /UG_GENE=1110013J02Rik /UG_TITLE=RIKEN cDNA 1110013J02 gene	763.66	782.42	769.16	P	P	P	1028.86	1073.11	1047.65	P	P	P	1.36	100	100	0.000699652
1455111_at	Mus musculus 8 days embryo whole body cDNA, RIKEN full-length enriched library, clone:5730455K20 product:unknown EST, full insert sequence.	AV298249		gb:AV298249 /DB_XREF=gi:16393023 /DB_XREF=AV298249 /CLONE=5730455K20 /FEA=EST /CNT=55 /TID=Mm.46272.2 /TIER=Stack /STK=24 /UG=Mm.46272 /LL=77929 /UG_GENE=A430107J06Rik /UG_TITLE=RIKEN cDNA A430107J06 gene	389.56	385.07	384.38	P	P	P	539.67	521.77	519.31	P	P	P	1.36	100	100	0.00116008
1456995_at	RIKEN cDNA 2700045P11 gene	BB426857	72555	gb:BB426857 /DB_XREF=gi:16423733 /DB_XREF=BB426857 /CLONE=C630004G15 /FEA=EST /CNT=6 /TID=Mm.209780.1 /TIER=ConsEnd /STK=6 /UG=Mm.209780 /UG_TITLE=ESTs	509.84	519.91	520.5	P	P	P	712.72	689.88	707.4	P	P	P	1.36	100	100	0.00258324
1447745_at	aquaporin 4	AW489155	11829	gb:AW489155 /DB_XREF=gi:7059425 /DB_XREF=UI-M-BH3-asi-g-06-0-UI.s1 /CLONE=UI-M-BH3-asi-g-06-0-UI /FEA=EST /CNT=2 /TID=Mm.76749.1 /TIER=ConsEnd /STK=2 /UG=Mm.76749 /UG_TITLE=ESTs	552.61	548.45	541.89	P	P	P	715.9	772.38	741.06	P	P	P	1.36	100	100	0.00801314
1445964_at	ESTs	BG067899		gb:BG067899 /DB_XREF=gi:12550468 /DB_XREF=H3059E01-3 /CLONE=H3059E01 /FEA=EST /CNT=2 /TID=Mm.173097.1 /TIER=ConsEnd /STK=2 /UG=Mm.173097 /UG_TITLE=ESTs	96.38	89.94	99.94	P	P	P	66.15	65.45	67	P	P	P	-1.44	100	100	0.00718943
1433286_at	RIKEN cDNA 4833417J16 gene	AK014715	73768	gb:AK014715.1 /DB_XREF=gi:12852733 /FEA=mRNA /CNT=1 /TID=Mm.159057.1 /TIER=ConsEnd /STK=0 /UG=Mm.159057 /LL=73768 /UG_GENE=4833417J16Rik /UG_TITLE=RIKEN cDNA 4833417J16 gene /DEF=Mus musculus 0 day neonate head cDNA, RIKEN full-length enriched library, clone:4833417J16:unclassifiable transcript, full insert sequence.	229.16	222.77	235.04	P	P	P	174.16	149.78	149.01	P	P	P	-1.45	100	100	0.0155301
1456718_at	expressed sequence AW109744	BB768133	99887	gb:BB768133 /DB_XREF=gi:16196853 /DB_XREF=BB768133 /CLONE=G370081N12 /FEA=EST /CNT=8 /TID=Mm.23325.1 /TIER=Stack /STK=8 /UG=Mm.23325 /UG_TITLE=ESTs	29.36	27.25	23.98	P	P	P	19.78	17.28	12.76	P	P	P	-1.62	100	100	0.00231777
1456787_at	Mus musculus 13 days embryo stomach cDNA, RIKEN full-length enriched library, clone:D530009B01 product:unknown EST, full insert sequence.	BM220188		gb:BM220188 /DB_XREF=gi:17780210 /DB_XREF=C0936F08-3 /CLONE=C0936F08 /FEA=EST /CNT=9 /TID=Mm.169436.1 /TIER=ConsEnd /STK=7 /UG=Mm.169436 /UG_TITLE=ESTs	209.75	204.7	199.89	P	P	P	124.44	102.48	96.86	P	P	P	-1.9	100	100	0.00353815
